# Supplementary material for: The Gene Expression of Proteins Involved in Intercellular Signaling and Neurodegeneration in the Substantia Nigra in a Mouse Subchronic Model of Parkinson’s Disease
Source: MDPI journal article supplement (doi:10.3390/ijms24033027), 2023-02-03
Supplement: s1 [file s1]

Table S1. Genes and their target names on PCR chips for Open Array technology

| No  | Gene           | Target Name   | Reporter |
|-----|----------------|---------------|----------|
| 1.  | <i>Gfap</i>    | Mm01253033_m1 | FAM      |
| 2.  | <i>Cyc1</i>    | Mm00470540_m1 | FAM      |
| 3.  | <i>Th</i>      | Mm00447557_m1 | FAM      |
| 4.  | <i>Ddc</i>     | Mm00516688_m1 | FAM      |
| 5.  | <i>Dbh</i>     | Mm00460472_m1 | FAM      |
| 6.  | <i>Pnmt</i>    | Mm00476993_m1 | FAM      |
| 7.  | <i>Maoa</i>    | Mm00558004_m1 | FAM      |
| 8.  | <i>Maob</i>    | Mm00555412_m1 | FAM      |
| 9.  | <i>Comt</i>    | Mm00514377_m1 | FAM      |
| 10. | <i>Drd1</i>    | Mm02620146_s1 | FAM      |
| 11. | <i>Drd2</i>    | Mm00438545_m1 | FAM      |
| 12. | <i>Drd3</i>    | Mm00432887_m1 | FAM      |
| 13. | <i>Drd4</i>    | Mm00432893_m1 | FAM      |
| 14. | <i>Drd5</i>    | Mm04210376_s1 | FAM      |
| 15. | <i>Kif1a</i>   | Mm00492863_m1 | FAM      |
| 16. | <i>Kif1b</i>   | Mm00801813_m1 | FAM      |
| 17. | <i>Kif5a</i>   | Mm00515265_m1 | FAM      |
| 18. | <i>Kif2c</i>   | Mm00728630_s1 | FAM      |
| 19. | <i>Dync1h1</i> | Mm00466548_m1 | FAM      |
| 20. | <i>Dynll1</i>  | Mm00850282_g1 | FAM      |
| 21. | <i>Dctn1</i>   | Mm01184845_m1 | FAM      |
| 22. | <i>Mapt</i>    | Mm00521988_m1 | FAM      |
| 23. | <i>Map2</i>    | Mm00485231_m1 | FAM      |
| 24. | <i>Mark2</i>   | Mm01220150_g1 | FAM      |
| 25. | <i>Tubb3</i>   | Mm00727586_s1 | FAM      |
| 26. | <i>Tuba1a</i>  | Mm00846967_g1 | FAM      |
| 27. | <i>Snca</i>    | Mm01188700_m1 | FAM      |
| 28. | <i>Syn1</i>    | Mm00449772_m1 | FAM      |
| 29. | <i>Stx1a</i>   | Mm00444008_m1 | FAM      |
| 30. | <i>Syt1</i>    | Mm00436858_m1 | FAM      |
| 31. | <i>Syt11</i>   | Mm00444517_m1 | FAM      |
| 32. | <i>Rab5a</i>   | Mm00727887_s1 | FAM      |
| 33. | <i>Rab7</i>    | Mm00784318_sH | FAM      |
| 34. | <i>Nsf</i>     | Mm00435390_m1 | FAM      |
| 35. | <i>Dnm1l</i>   | Mm01342903_m1 | FAM      |
| 36. | <i>Vps35</i>   | Mm00458167_m1 | FAM      |
| 37. | <i>Sod1</i>    | Mm01344233_g1 | FAM      |
| 38. | <i>Gpx1</i>    | Mm00656767_g1 | FAM      |
| 39. | <i>Gsr</i>     | Mm00439154_m1 | FAM      |
| 40. | <i>Txnrd1</i>  | Mm00443675_m1 | FAM      |
| 41. | <i>Nos1</i>    | Mm01208059_m1 | FAM      |
| 42. | <i>Prdx1</i>   | Mm01621996_s1 | FAM      |
| 43. | <i>Nfe2l2</i>  | Mm00477784_m1 | FAM      |
| 44. | <i>Keap1</i>   | Mm00497268_m1 | FAM      |
| 45. | <i>Sigmar1</i> | Mm01223547_g1 | FAM      |
| 46. | <i>Park2</i>   | Mm01323528_m1 | FAM      |
| 47. | <i>Ube2n</i>   | Mm00779119_s1 | FAM      |

|     |                |               |     |
|-----|----------------|---------------|-----|
| 48. | <i>Uba3</i>    | Mm00495866_m1 | FAM |
| 49. | <i>Psmb4</i>   | Mm01263563_m1 | FAM |
| 50. | <i>Psmc3</i>   | Mm00477177_m1 | FAM |
| 51. | <i>Psmc4</i>   | Mm01263490_m1 | FAM |
| 52. | <i>Usp47</i>   | Mm00659716_m1 | FAM |
| 53. | <i>Ubb</i>     | Mm01622233_g1 | FAM |
| 54. | <i>Ifng</i>    | Mm01168134_m1 | FAM |
| 55. | <i>Tgfb1</i>   | Mm01178820_m1 | FAM |
| 56. | <i>Akt1</i>    | Mm01331626_m1 | FAM |
| 57. | <i>Ptgs2</i>   | Mm00478374_m1 | FAM |
| 58. | <i>Traf1</i>   | Mm00493827_m1 | FAM |
| 59. | <i>Cxcl11</i>  | Mm00444662_m1 | FAM |
| 60. | <i>Casp1</i>   | Mm00438023_m1 | FAM |
| 61. | <i>Casp3</i>   | Mm01195085_m1 | FAM |
| 62. | <i>Parp1</i>   | Mm01321084_m1 | FAM |
| 63. | <i>Aifm1</i>   | Mm00442548_m1 | FAM |
| 64. | <i>Bcl2l11</i> | Mm00437796_m1 | FAM |
| 65. | <i>Map3k5</i>  | Mm00434883_m1 | FAM |
| 66. | <i>Cib1</i>    | Mm00501944_m1 | FAM |
| 67. | <i>Trp53</i>   | Mm01731290_g1 | FAM |
| 68. | <i>Bax</i>     | Mm00432051_m1 | FAM |
| 69. | <i>Fos</i>     | Mm00487425_m1 | FAM |
| 70. | <i>Mapk8</i>   | Mm00489514_m1 | FAM |
| 71. | <i>Lamp2</i>   | Mm00495267_m1 | FAM |
| 72. | <i>Atg16l1</i> | Mm00513085_m1 | FAM |
| 73. | <i>Atg5</i>    | Mm01187303_m1 | FAM |
| 74. | <i>Tnf</i>     | Mm00443258_m1 | FAM |
| 75. | <i>Ctsb</i>    | Mm01310506_m1 | FAM |
| 76. | <i>Capn1</i>   | Mm00482964_m1 | FAM |
| 77. | <i>Ern2</i>    | Mm00469005_m1 | FAM |
| 78. | <i>Eif2ak3</i> | Mm00438700_m1 | FAM |
| 79. | <i>Atf6</i>    | Mm01295319_m1 | FAM |

Table S2. Genes that are not expressed in the substantia nigra in mice

| <b>Gene</b>                              | <b>Protein</b>                                        |
|------------------------------------------|-------------------------------------------------------|
| <b>Monoamines synthesis, degradation</b> |                                                       |
| <i>Dbh</i>                               | Dopamine beta-hydroxylase                             |
| <i>Pnmt</i>                              | Phenylethanolamine-N-methyltransferase                |
| <b>Dopamine transport and reception</b>  |                                                       |
| <i>Drd1</i>                              | Dopamine receptor D1                                  |
| <i>Drd3</i>                              | Dopamine receptor D3                                  |
| <i>Drd4</i>                              | Dopamine receptor D4                                  |
| <i>Drd5</i>                              | Dopamine receptor D5                                  |
| <b>Axonal transport</b>                  |                                                       |
| <i>Kif2c</i>                             | Kinesin family member 2C                              |
| <b>Inflammation and glial activation</b> |                                                       |
| <i>Ifng</i>                              | Interferon gamma                                      |
| <i>Ptgs2</i>                             | Prostaglandin-endoperoxide synthase 2                 |
| <i>Traf1</i>                             | TNF receptor-associated factor 1                      |
| <i>Cxcl11</i>                            | Chemokine (C-X-C motif) ligand 11                     |
| <b>Cell death</b>                        |                                                       |
| <i>Casp1</i>                             | Caspase 1                                             |
| <i>Tnf</i>                               | Tumor necrosis factor                                 |
| <i>Ern2</i>                              | Serine/threonine-protein kinase/endoribonuclease IRE2 |
